# Supplementary material for: Gut Microbiota Predicts Healthy Late-Life Aging in Male Mice
Source: MDPI journal article supplement (doi:10.3390/nu13093290), 2021-09-21
Supplement: s1 [file s1]

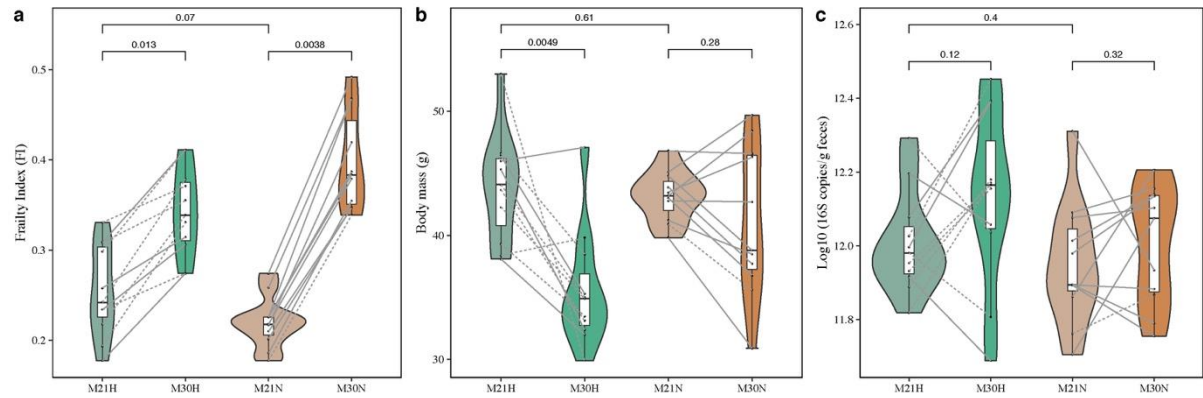

**Figure S1. The effects of healthy aging on FI, body mass and total bacterial load. a,** Frailty index changes with age. Mice were grouped into healthy and normal aging based on the median  $\Delta$ FI at 30 months of age. **b,** Body mass changes with age. **c,** Total bacterial load changes with age. Points obtained for the same subject from 21 and 30 months of age are joined by solid (AL diet) and dotted (CR diet) lines. *P* value shown the results of Wilcoxon–Mann–Whitney test (unpaired) and Wilcoxon signed rank test (paired).

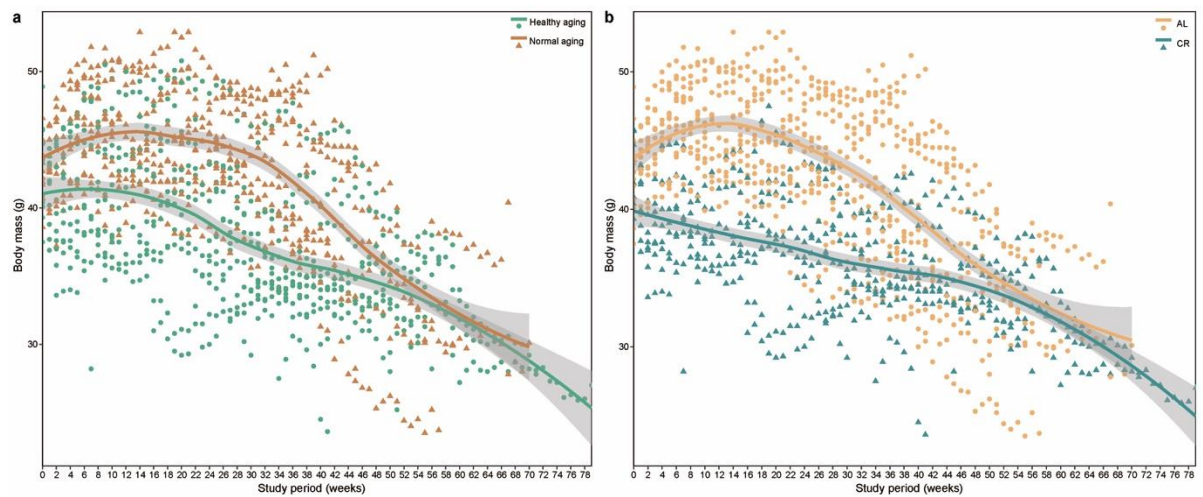

**Figure S2. The changes of body mass over time. a,** Healthy aging versus Normal aging mice. **b,** AL diet versus CR diet. Curves show LOESS fit for the data per category, and shaded areas show 95% confidence intervals for the fit.

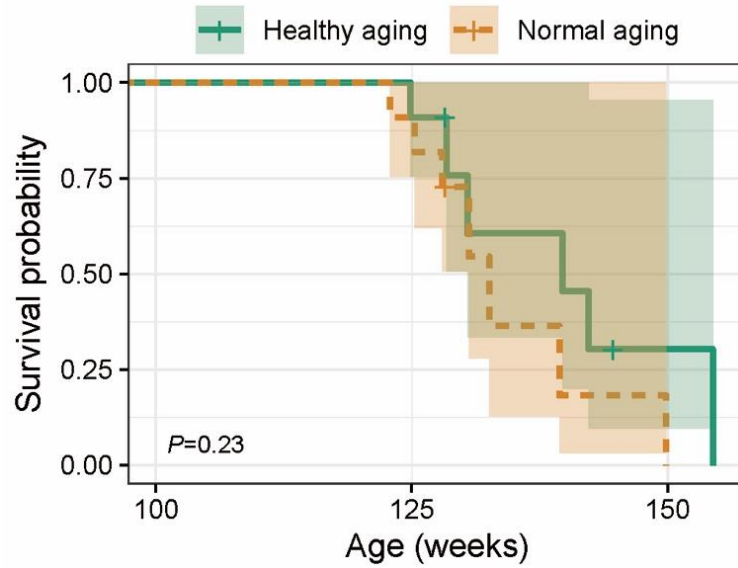

**Figure S3. The survival probability was computed by the Kaplan-Meier method.  $P$  value is the result of log-rank test.**

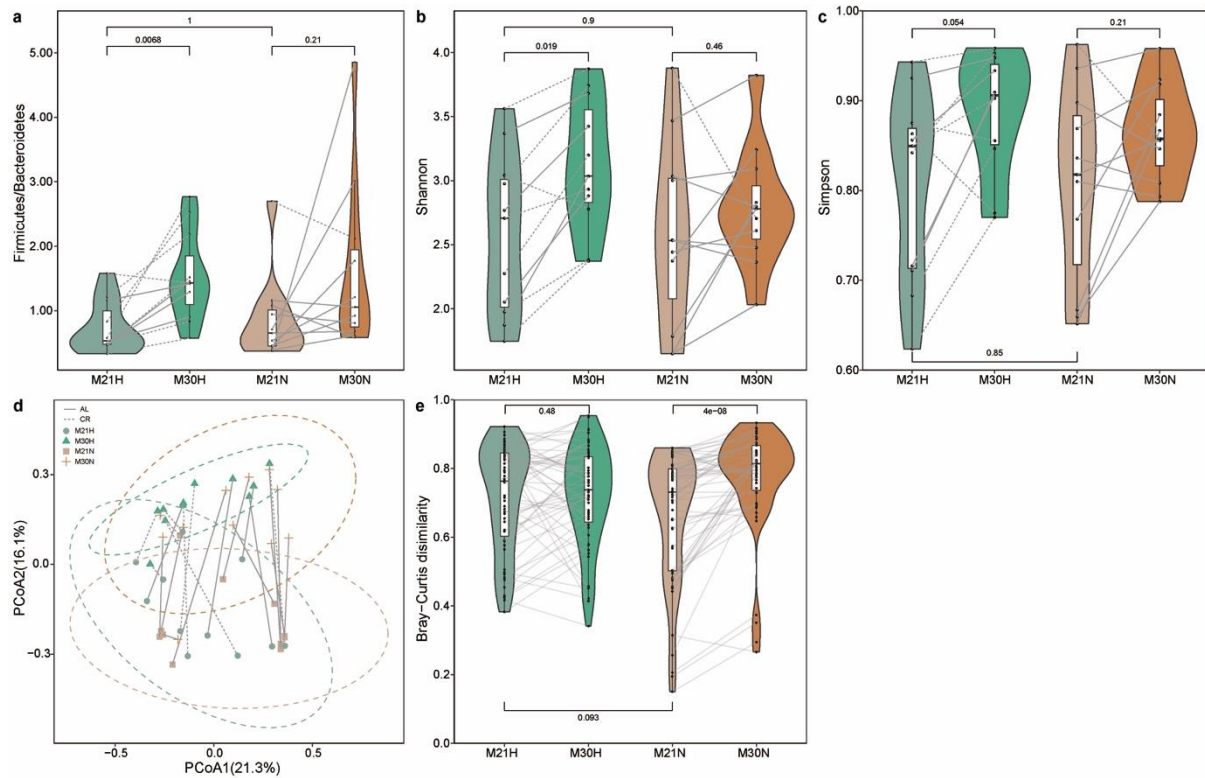

**Figure S4. Impact of healthy aging on gut microbial communities. a**, The ratio of Firmicutes to Bacteroidetes. Alpha diversity using Shannon (**b**) and Simpson (**c**) index. **d**, Beta diversity using Principal Coordinate Analysis (PCoA) of Bray-Curtis dissimilarity. The dotted ellipse borders with color represent the 95% confidence interval. **e**, Boxplot of gut microbiome Bray-Curtis dissimilarity between subjects within each group. Mice were grouped into healthy and normal aging based on the median  $\Delta FI$  at 30 months of age. Points obtained for the same subject from 21 and 30 months of age in **a-d** are joined by solid (AL

diet) and dotted (CR diet) lines. Points obtained for the same subject pairs from 21 and 30 months of age in **e** are joined by solid line. *P* value shown are the result of Wilcoxon–Mann–Whitney test (unpaired) and Wilcoxon signed rank test (paired).

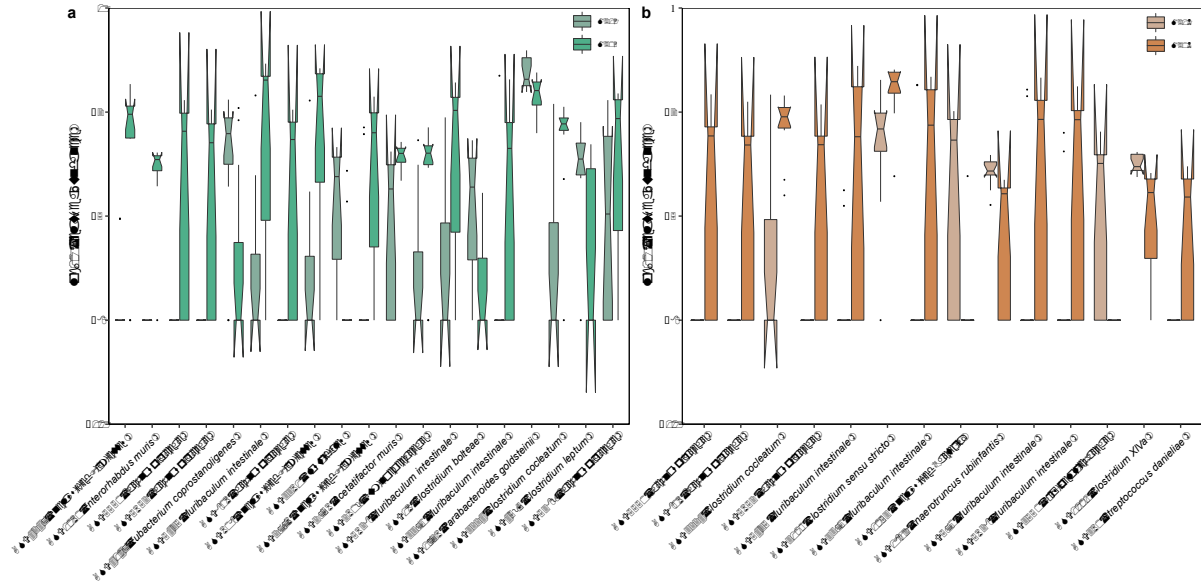

**Figure S5. Relative abundance of aging related microbial features in both normal and healthy aging mice.** The differential abundant ASVs that differed significantly between 21 and 30 months of age for healthy (a) and normal (b) aging mice identified by analysis of composition of microbiomes (ANCOM). The model was simultaneously adjusted for potential confounders including cage, cohort, diet, and body mass. Mice were grouped into healthy and normal aging based on the median  $\Delta$ FI at 30 months of age. The top differentially abundant taxa were ranked based on their *W* statistics (a high “*w* score” generated by this test indicates the greater likelihood that the null hypothesis can be rejected, indicating the number of times a parameter is significantly different between groups) (from left to right). The relative abundance (%) are plotted on log10 scale. The notches in the boxplots show the 95% confidence interval around the median.

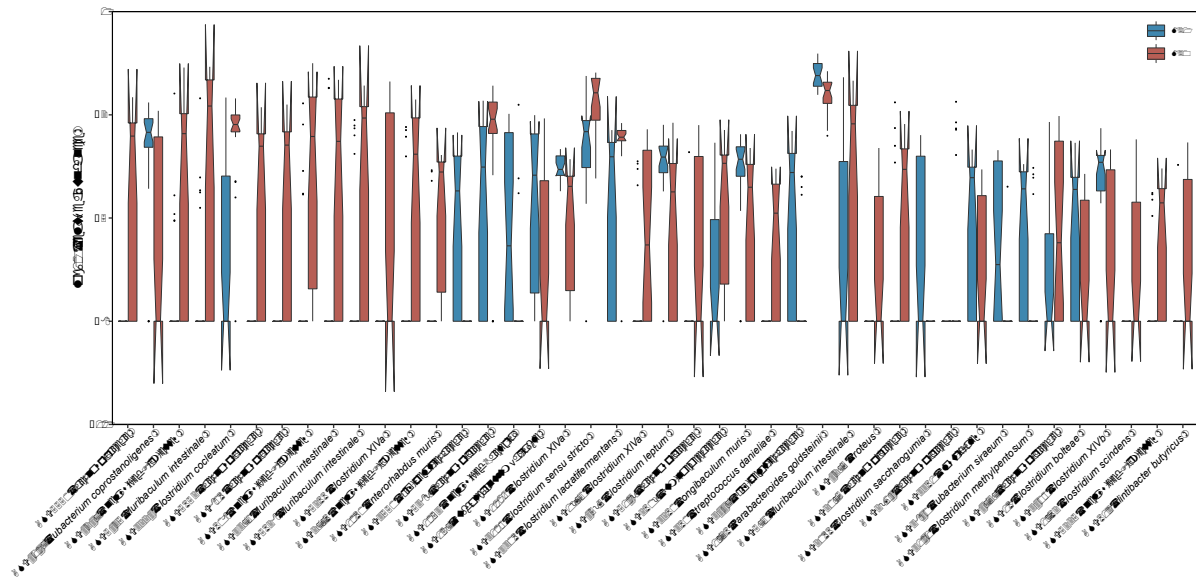

**Figure S6. Relative abundance of aging related microbial features.** The differential abundant ASVs that differed significantly between 21 and 30 months of age identified by ANCOM. The model was simultaneously adjusted for potential confounders including cage, cohort, diet, and body mass. The top differentially abundant taxa were ranked based on their W statistics (a high “w score” generated by this test indicates the greater likelihood that the null hypothesis can be rejected, indicating the number of times a parameter is significantly different between groups) (from left to right). The relative abundance (%) are plotted on log10 scale. The notches in the boxplots show the 95% confidence interval around the median.

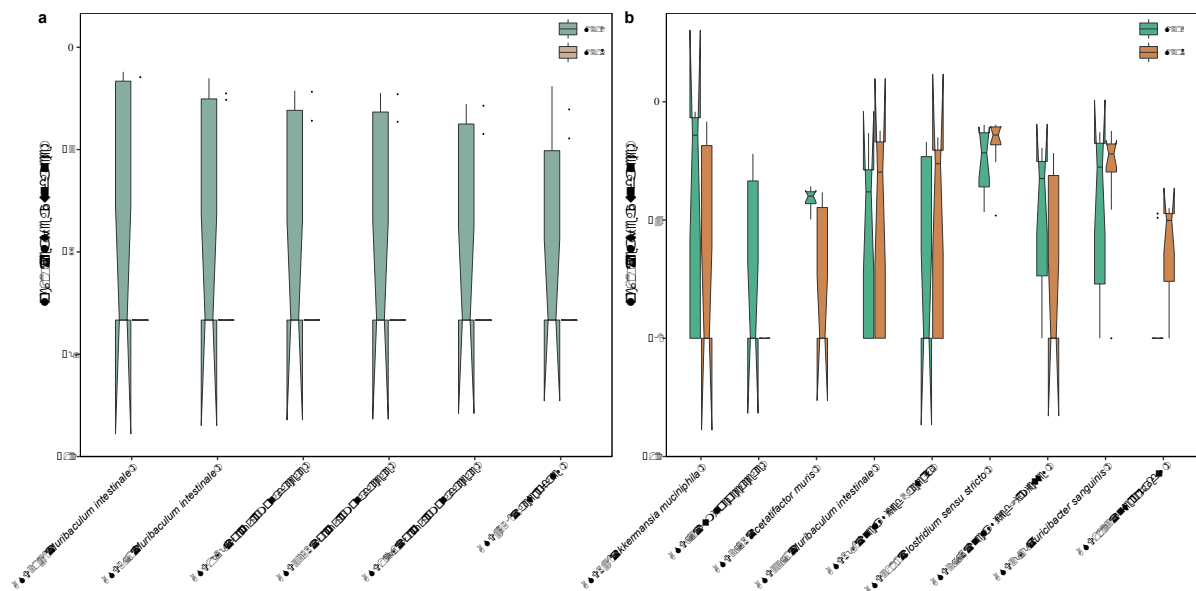

**Figure S7 Relative abundance of healthy aging related microbial features.** The differential abundant ASVs that differed significantly between healthy and normal aging mice at 21 (a) and 30 (b) months of ages identified by ANCOM. The model was simultaneously adjusted for potential confounders including cage, cohort, diet, and body

mass. Mice were grouped into healthy and normal aging based on the median  $\Delta FI$  at 30 months of age. The top differentially abundant taxa were ranked based on their W statistics (a high “w score” generated by this test indicates the greater likelihood that the null hypothesis can be rejected, indicating the number of times a parameter is significantly different between groups) (from left to right). The relative abundance (%) are plotted on log<sub>10</sub> scale. The notches in the boxplots show the 95% confidence interval around the median.

**Table S1. 16S rRNA gene sequencing metadata.**

| Sample ID | Mouse ID | Time point | Diet | Barcode-sequence | Raw sequence count | Final sequence count | Number of ASVs | Aging Status  |
|-----------|----------|------------|------|------------------|--------------------|----------------------|----------------|---------------|
| YY001     | A-1      | M21        | AL   | GGATACTCGCAT     | 154570             | 135037               | 106            | Normal aging  |
| YY004     | A-1      | M30        | AL   | ACTAGACGACTA     | 415374             | 352401               | 157            | Normal aging  |
| YY010     | A-21     | M21        | AL   | CTTGTGCGACAA     | 439383             | 373296               | 216            | Normal aging  |
| YY012     | A-21     | M30        | AL   | AGGTAAAGTGCT     | 422939             | 338440               | 250            | Normal aging  |
| YY013     | A-23     | M21        | AL   | ATGCTCTAGAGA     | 390427             | 324117               | 239            | Healthy aging |
| YY015     | A-23     | M30        | AL   | CGATTTAGGCCA     | 299124             | 248027               | 240            | Healthy aging |
| YY016     | A-24     | M21        | AL   | GGTACAATGATC     | 449154             | 380134               | 288            | Normal aging  |
| YY018     | A-24     | M30        | AL   | AGAGTAAGCCGG     | 382718             | 313578               | 229            | Normal aging  |
| YY019     | A-26     | M21        | CR   | GACACTCACCGT     | 371088             | 310319               | 300            | Healthy aging |
| YY021     | A-26     | M30        | CR   | AGCTAGCGTTCA     | 353458             | 290435               | 292            | Healthy aging |
| YY022     | A-27     | M21        | CR   | TCCTTCTGCCCTA    | 371714             | 306639               | 293            | Normal aging  |
| YY024     | A-27     | M30        | CR   | ACTGTCGCAGTA     | 465584             | 388876               | 214            | Normal aging  |
| YY025     | A-28     | M21        | CR   | CTGATGTACACG     | 424321             | 351496               | 311            | Healthy aging |
| YY027     | A-28     | M30        | CR   | TCAGAGTAGACT     | 393168             | 311260               | 305            | Healthy aging |
| YY045     | A-81     | M21        | AL   | G TTCAGACTAGC    | 338153             | 269337               | 176            | Normal aging  |
| YY053     | A-101    | M21        | AL   | ACTAATACGCGA     | 435557             | 391101               | 160            | Healthy aging |
| YY063     | A-281    | M21        | AL   | ACGAGGAGTCGA     | 415094             | 335968               | 226            | Normal aging  |
| YY066     | A-284    | M21        | AL   | ACATCCCTACTT     | 394919             | 322213               | 235            | Healthy aging |
| YY067     | A-289    | M21        | CR   | CCTTAAGGGCAT     | 438364             | 364232               | 177            | Healthy aging |
| YY068     | A-290    | M21        | CR   | TTCGTGAGGATA     | 418761             | 348879               | 156            | Healthy aging |
| YY071     | A-297    | M21        | AL   | GCGGTACTACTA     | 376527             | 320687               | 208            | Normal aging  |
| YY072     | A-298    | M21        | AL   | TCGTTCAGGACC     | 441041             | 365541               | 195            | Normal aging  |
| YY073     | A-300    | M21        | AL   | CTTCTTCGCCCT     | 419897             | 352836               | 219            | Normal aging  |
| YY079     | A-306    | M21        | CR   | TCAGCTGACTAG     | 414372             | 337781               | 229            | Healthy aging |
| YY097     | A-81     | M30        | AL   | AGTCGAACGAGG     | 125864             | 113019               | 149            | Normal aging  |

|       |       |     |    |               |        |        |     |               |
|-------|-------|-----|----|---------------|--------|--------|-----|---------------|
| YY099 | A-101 | M30 | AL | TGCAGTCCTCGA  | 143687 | 128409 | 157 | Healthy aging |
| YY101 | A-161 | M21 | AL | GTGGAGTCTCAT  | 164126 | 160052 | 150 | Normal aging  |
| YY103 | A-161 | M30 | AL | GCGTTCTAGCTG  | 152005 | 126296 | 148 | Normal aging  |
| YY104 | A-164 | M21 | AL | GCTGTACGGATT  | 113804 | 110673 | 128 | Healthy aging |
| YY106 | A-164 | M30 | AL | AGTCGTGCACAT  | 123834 | 110799 | 116 | Healthy aging |
| YY107 | A-165 | M21 | CR | ACCATAGCTCCG  | 132298 | 124562 | 152 | Healthy aging |
| YY109 | A-165 | M30 | CR | GCTCGAAGATTC  | 156099 | 141296 | 131 | Healthy aging |
| YY110 | A-166 | M21 | CR | TAGGCATGCTTG  | 179628 | 174312 | 153 | Healthy aging |
| YY112 | A-166 | M30 | CR | ATCACCAGGTGT  | 109369 | 101016 | 118 | Healthy aging |
| YY118 | A-184 | M21 | AL | GAGATCGCCTAT  | 147393 | 142804 | 137 | Normal aging  |
| YY120 | A-184 | M30 | AL | TGGTCAACGATA  | 91525  | 83645  | 95  | Normal aging  |
| YY126 | A-281 | M30 | AL | ATTCTGCCGAAG  | 126405 | 98450  | 201 | Normal aging  |
| YY130 | A-284 | M30 | AL | CAAATTCGGGAT  | 83711  | 75898  | 202 | Healthy aging |
| YY133 | A-289 | M30 | CR | ACTTCCAAC TTC | 111893 | 96359  | 134 | Healthy aging |
| YY136 | A-290 | M30 | CR | GTCGTGTAGCCT  | 117763 | 114010 | 176 | Healthy aging |
| YY142 | A-297 | M30 | AL | GTACGATATGAC  | 199365 | 179853 | 161 | Normal aging  |
| YY145 | A-298 | M30 | AL | CCAATACGCCTG  | 122230 | 113580 | 146 | Normal aging  |
| YY148 | A-300 | M30 | AL | TGTCGCAAATAG  | 151897 | 136678 | 141 | Normal aging  |
| YY151 | A-306 | M30 | CR | TGTAACGCCGAT  | 178578 | 159425 | 211 | Healthy aging |

**Table S2. The effect of aging process on blood cells in circulation.** The data was shown as mean  $\pm$  standard deviation. *P* value shown the results of Wilcoxon–Mann–Whitney test (unpaired) and Wilcoxon signed rank test (paired) adjusted using the Benjamini–Hochberg FDR method. WBC: White blood cell, NE: Neutrophils count, LY: Lymphocytes count, MO: Monocytes count, EO: Eosinophils count, BA: Basophils count, NEp: Neutrophils percentage, LYp: Lymphocytes percentage, MOp: Monocytes percentage, EOp: Eosinophils percentage, BAp: Basophils percentage, RBC: Red blood cell count, Hb: Hemoglobin, HCT: Hematocrit, MCV: Mean corpuscular volume, MCH: Mean corpuscular hemoglobin, MCHC: Mean corpuscular hemoglobin concentration, RDW: Red cell distribution width, PLT: Platelet count, MPV: Mean platelet volume, NLR: Neutrophils to Lymphocytes ratio.

|               | M21           |                 |                 | M30           |                 |                | Wilcoxon test     | Wilcoxon–Mann–Whitney test |                   |                   |                   |                 |                 |
|---------------|---------------|-----------------|-----------------|---------------|-----------------|----------------|-------------------|----------------------------|-------------------|-------------------|-------------------|-----------------|-----------------|
| Blood markers | M21<br>(n=22) | M21_H<br>(n=11) | M21_N<br>(n=11) | M30<br>(n=19) | M30_H<br>(n=10) | M30_N<br>(n=9) | M21_H vs<br>M21_N | M21 vs<br>M30              | M21_H vs<br>M30_H | M21_N vs<br>M30_N | M30_H vs<br>M30_N | M21 vs<br>M30_H | M21 vs<br>M30_N |

|      |                    |                     |                   |                    |                  |                    |       |       |       |       |       |       |       |
|------|--------------------|---------------------|-------------------|--------------------|------------------|--------------------|-------|-------|-------|-------|-------|-------|-------|
| WBC  | 9.830 ±<br>2.413   | 10.273 ±<br>2.034   | 9.387 ±<br>2.768  | 6.441 ±<br>4.273   | 6.814 ±<br>4.291 | 6.027 ±<br>4.472   | 0.966 | 0.022 | 0.177 | 0.157 | 0.746 | 0.123 | 0.046 |
| NE   | 1.831 ±<br>0.63    | 2.021 ±<br>0.645    | 1.641 ±<br>0.581  | 2.183 ±<br>1.936   | 2.076 ±<br>1.438 | 2.301 ±<br>2.465   | 0.839 | 0.699 | 0.578 | 0.97  | 0.941 | 0.871 | 0.792 |
| LY   | 7.756 ±<br>1.953   | 7.993 ±<br>1.565    | 7.52 ±<br>2.332   | 4.328 ±<br>2.691   | 5.135 ±<br>2.518 | 3.432 ±<br>2.729   | 0.943 | 0.001 | 0.059 | 0.017 | 0.469 | 0.033 | 0.004 |
| MO   | 0.234 ±<br>0.082   | 0.25 ±<br>0.099     | 0.218 ±<br>0.061  | 0.271 ±<br>0.199   | 0.261 ±<br>0.162 | 0.282 ±<br>0.243   | 0.839 | 0.917 | 0.874 | 0.873 | 0.967 | 0.871 | 1     |
| EO   | 0.008 ±<br>0.014   | 0.005 ±<br>0.009    | 0.011 ±<br>0.018  | 0.026 ±<br>0.071   | 0.041 ±<br>0.096 | 0.01 ±<br>0.019    | 0.839 | 0.443 | 0.42  | 0.97  | 0.709 | 0.348 | 0.866 |
| BA   | 0.001 ±<br>0.003   | 0 ±0                | 0.002 ±<br>0.004  | 0.001 ±<br>0.002   | 0 ±0             | 0.001 ±<br>0.003   | 0.839 | 0.699 | NA    | 0.873 | 0.6   | 0.441 | 0.944 |
| NEp  | 18.582 ±<br>3.969  | 19.552 ±<br>4.005   | 17.613 ±<br>3.87  | 33.034 ±<br>15.552 | 27.383<br>±8.807 | 39.312 ±<br>19.305 | 0.839 | 0.001 | 0.059 | 0.016 | 0.51  | 0.009 | 0.005 |
| LYp  | 78.881 ±<br>4.36   | 77.948 ±<br>4.609   | 79.814 ±<br>4.093 | 61.905 ±<br>17.272 | 68.685<br>±9.708 | 54.372 ±<br>21.069 | 0.839 | 0.001 | 0.059 | 0.016 | 0.51  | 0.009 | 0.005 |
| MOp  | 2.439 ±<br>0.804   | 2.422 ±<br>0.775    | 2.456 ±<br>0.87   | 4.69 ±<br>3.031    | 3.467 ±<br>1.208 | 6.049 ±<br>3.884   | 0.843 | 0.002 | 0.12  | 0.016 | 0.414 | 0.07  | 0.004 |
| EOp  | 0.081 ±<br>0.113   | 0.063 ±<br>0.08     | 0.099 ±<br>0.14   | 0.312 ±<br>0.593   | 0.432 ±<br>0.784 | 0.179 ±<br>0.247   | 0.839 | 0.339 | 0.474 | 0.777 | 0.967 | 0.378 | 0.56  |
| BAP  | 0.015 ±<br>0.019   | 0.012 ±<br>0.011    | 0.018 ±<br>0.024  | 0.046 ±<br>0.062   | 0.032 ±<br>0.045 | 0.061 ±<br>0.077   | 0.843 | 0.502 | 0.874 | 0.542 | 0.709 | 0.871 | 0.391 |
| RBC  | 8.808 ±<br>1.217   | 9.08 ±<br>0.438     | 8.535 ±<br>1.66   | 7.608 ±<br>1.697   | 7.935 ±<br>0.742 | 7.246 ±<br>2.361   | 0.839 | 0.002 | 0.012 | 0.196 | 0.6   | 0.009 | 0.053 |
| Hb   | 10.855 ±<br>1.698  | 11.273 ±<br>1.07    | 10.436 ±<br>2.128 | 9.837 ±<br>1.649   | 10.29 ±<br>0.61  | 9.333 ±<br>2.27    | 0.843 | 0.023 | 0.059 | 0.18  | 0.429 | 0.123 | 0.053 |
| HCT  | 37.518 ±<br>5.18   | 38.882 ±<br>1.982   | 36.155 ±<br>6.952 | 35.304 ±<br>6.621  | 35.647<br>±3.047 | 34.922 ±<br>9.374  | 0.839 | 0.039 | 0.059 | 0.542 | 0.709 | 0.07  | 0.236 |
| MCV  | 59.432 ±<br>79.046 | 76.473 ±<br>111.721 | 42.391 ±<br>0.89  | 47.111 ±<br>5.321  | 45.17 ±<br>4.29  | 49.267 ±<br>5.75   | 0.839 | 0.005 | 0.316 | 0.016 | 0.467 | 0.084 | 0.009 |
| MCH  | 12.332 ±<br>0.978  | 12.409 ±<br>0.836   | 12.255 ±<br>1.139 | 13.126 ±<br>1.163  | 13.04 ±<br>0.9   | 13.222 ±<br>1.453  | 0.881 | 0.064 | 0.263 | 0.24  | 0.967 | 0.123 | 0.236 |
| MCHC | 28.932 ±<br>2.096  | 28.973 ±<br>1.826   | 28.891 ±<br>2.427 | 28.053 ±<br>2.756  | 29.01 ±<br>2.87  | 26.989 ±<br>2.323  | 0.919 | 0.396 | 0.874 | 0.18  | 0.383 | 0.871 | 0.083 |
| RDW  | 17.532 ±<br>0.764  | 17.655 ±<br>0.636   | 17.409 ±<br>0.888 | 19.621 ±<br>2.842  | 18.93 ±<br>2.155 | 20.389 ±<br>3.42   | 0.839 | 0.037 | 0.459 | 0.065 | 0.668 | 0.189 | 0.053 |

|     |                          |                          |                          |                          |                        |                          |       |       |       |       |       |       |       |
|-----|--------------------------|--------------------------|--------------------------|--------------------------|------------------------|--------------------------|-------|-------|-------|-------|-------|-------|-------|
|     | 1390.455<br>±<br>254.416 | 1470.727<br>±<br>253.589 | 1310.182<br>±<br>239.676 | 1561.263<br>±<br>418.144 | 1777.1<br>±<br>314.232 | 1321.444<br>±<br>399.227 |       |       |       |       |       |       |       |
| PLT |                          |                          |                          |                          |                        |                          | 0.839 | 0.234 | 0.063 | 0.873 | 0.226 | 0.009 | 0.56  |
|     | 5.182 ±<br>0.168         | 5.2 ±<br>0.126           | 5.164 ±<br>0.206         | 5.537 ±<br>0.527         | 5.26 ±<br>0.19         | 5.844 ±<br>0.619         |       |       |       |       |       |       |       |
| MPV |                          |                          |                          |                          |                        |                          | 0.843 | 0.02  | 0.578 | 0.017 | 0.226 | 0.348 | 0.005 |
|     | 0.239 ±<br>0.065         | 0.255 ±<br>0.068         | 0.224 ±<br>0.061         | 0.693 ±<br>0.646         | 0.425 ±<br>0.205       | 0.991 ±<br>0.837         |       |       |       |       |       |       |       |
| NLR |                          |                          |                          |                          |                        |                          | 0.839 | 0.001 | 0.059 | 0.016 | 0.51  | 0.009 | 0.005 |

**Table S3. The microbial features associated with blood markers identified by MaAsLin2.** The relative abundance (%) was shown as mean ± standard deviation.

| ASVs    | Taxonomy                                | Relative abundance (%) |
|---------|-----------------------------------------|------------------------|
| ASV890  | Ruminococcaceae                         | 0.004 ±0.011           |
| ASV806  | Lachnospiraceae                         | 0.166 ±0.394           |
| ASV5690 | <i>Flavonifractor plautii</i>           | 0.242 ±0.397           |
| ASV5652 | Lachnospiraceae                         | 0.153 ±0.355           |
| ASV5625 | Unclassified Firmicutes                 | 0.054 ±0.234           |
| ASV5550 | Lachnospiraceae                         | 0.292 ±0.671           |
| ASV555  | <i>Acetatifactor muris</i>              | 0.002 ±0.005           |
| ASV5396 | <i>Acetatifactor muris</i>              | 0.025 ±0.079           |
| ASV5138 | Unclassified Proteobacteria             | 0.108 ±0.321           |
| ASV4558 | Bacteroidales                           | 0.355 ±1.284           |
| ASV3949 | <i>Anaerotruncus</i>                    | 0.010 ±0.018           |
| ASV3897 | Unclassified Bacteria                   | 0.019 ±0.056           |
| ASV3729 | <i>Clostridium aldenense</i>            | 0.003 ±0.010           |
| ASV3535 | <i>Muribaculum intestinale</i>          | 0.084 ±0.226           |
| ASV2973 | <i>Intestinimonas butyriciproducens</i> | 0.006 ±0.016           |
| ASV2878 | Lachnospiraceae                         | 0.020 ±0.064           |
| ASV2868 | <i>Oscillibacter</i>                    | 0.007 ±0.024           |
| ASV2733 | <i>Clostridium XIVa</i>                 | 0.048 ±0.154           |
| ASV2710 | Unclassified Firmicutes                 | 0.001 ±0.002           |
| ASV2261 | Ruminococcaceae                         | 0.001 ±0.003           |
| ASV1983 | Ruminococcaceae                         | 0.043 ±0.085           |
| ASV1970 | <i>Clostridium XIVa</i>                 | 0.036 ±0.077           |
| ASV1513 | Lachnospiraceae                         | 0.002 ±0.002           |
| ASV1466 | Unclassified Firmicutes                 | 0.005 ±0.018           |



**Table S4. The microbial features associated with Frailty index identified by MaAsLin2.**

The relative abundance (%) was shown as mean  $\pm$  standard deviation.

| ASVs    | Taxonomy                           | Relative abundance (%) |
|---------|------------------------------------|------------------------|
| ASV3100 | <i>Clostridium sensu stricto</i>   | 4.148 $\pm$ 5.608      |
| ASV2882 | <i>Clostridium XIVa</i>            | 0.108 $\pm$ 0.133      |
| ASV847  | <i>Phoceia massiliensis</i>        | 0.004 $\pm$ 0.008      |
| ASV338  | Lachnospiraceae                    | 0.011 $\pm$ 0.039      |
| ASV1726 | <i>Parabacteroides goldsteinii</i> | 13.017 $\pm$ 13.852    |
| ASV5389 | Lachnospiraceae                    | 1.061 $\pm$ 1.702      |
| ASV1123 | <i>Enterorhabdus</i>               | 0.018 $\pm$ 0.025      |
| ASV1101 | <i>Clostridium XIVa</i>            | 0.025 $\pm$ 0.025      |
| ASV807  | Bacteria                           | 0.001 $\pm$ 0.003      |
| ASV742  | Lachnospiraceae                    | 0.010 $\pm$ 0.033      |
| ASV157  | <i>Subdoligranulum variabile</i>   | 0.131 $\pm$ 0.243      |
| ASV232  | Ruminococcaceae                    | 0.009 $\pm$ 0.014      |
| ASV2980 | Lachnospiraceae                    | 0.101 $\pm$ 0.220      |
| ASV466  | Lachnospiraceae                    | 0.028 $\pm$ 0.080      |

**Table S5. Differentially abundant taxa between 21 and 30 months of age in healthy aging mice detected by ANCOM, adjusted for cage, cohort and diet.** For each ASV, the first column represents its taxonomy information, the second column represents its W score and subsequent four columns represent logical indicators of whether it is differentially abundant under a series of cutoffs (0.9, 0.8, 0.7, and 0.6, a prevalence cutoff on the entire set of ASVs). The last two columns denote its relative abundance (%) in each group shown as mean  $\pm$  standard deviation.

| ASVs    | Taxonomy                             | W_score | detected_0.9 | detected_0.8 | detected_0.7 | detected_0.6 | M21H              | M30H              |
|---------|--------------------------------------|---------|--------------|--------------|--------------|--------------|-------------------|-------------------|
| ASV4247 | Unclassified Firmicutes              | 368     | TRUE         | TRUE         | TRUE         | TRUE         | 0 $\pm$ 0         | 1.357 $\pm$ 1.883 |
| ASV1060 | <i>Enterorhabdus muris</i>           | 352     | TRUE         | TRUE         | TRUE         | TRUE         | 0 $\pm$ 0         | 0.039 $\pm$ 0.023 |
| ASV5550 | Lachnospiraceae                      | 350     | TRUE         | TRUE         | TRUE         | TRUE         | 0 $\pm$ 0         | 0.631 $\pm$ 0.797 |
| ASV5652 | Lachnospiraceae                      | 345     | TRUE         | TRUE         | TRUE         | TRUE         | 0 $\pm$ 0         | 0.331 $\pm$ 0.44  |
| ASV4147 | <i>Eubacterium coprostanoligenes</i> | 331     | FALSE        | TRUE         | TRUE         | TRUE         | 0.622 $\pm$ 0.836 | 0.174 $\pm$ 0.414 |
| ASV5435 | <i>Muribaculum intestinale</i>       | 330     | FALSE        | TRUE         | TRUE         | TRUE         | 0.275 $\pm$ 0.906 | 7.51 $\pm$ 8.01   |
| ASV806  | Lachnospiraceae                      | 326     | FALSE        | TRUE         | TRUE         | TRUE         | 0 $\pm$ 0         | 0.345 $\pm$ 0.446 |
| ASV608  | Unclassified Firmicutes              | 324     | FALSE        | TRUE         | TRUE         | TRUE         | 0.196 $\pm$ 0.648 | 5.741 $\pm$ 7.033 |
| ASV3361 | Clostridiales                        | 277     | FALSE        | FALSE        | TRUE         | TRUE         | 0.027 $\pm$ 0.032 | 0.002 $\pm$ 0.006 |
| ASV2776 | Unclassified Firmicutes              | 275     | FALSE        | FALSE        | TRUE         | TRUE         | 0.054 $\pm$ 0.123 | 0.74 $\pm$ 1.023  |
| ASV2756 | <i>Acetatifactor muris</i>           | 261     | FALSE        | FALSE        | FALSE        | TRUE         | 0.017 $\pm$ 0.024 | 0.069 $\pm$ 0.042 |

|         |                                    |     |       |       |       |      |                 |               |
|---------|------------------------------------|-----|-------|-------|-------|------|-----------------|---------------|
| ASV2609 | Ruminococcaceae                    | 256 | FALSE | FALSE | FALSE | TRUE | 0.018 ± 0.046   | 0.085 ± 0.1   |
| ASV5628 | <i>Muribaculum intestinale</i>     | 254 | FALSE | FALSE | FALSE | TRUE | 0.145 ± 0.258   | 1.845 ± 2.288 |
| ASV16   | <i>Clostridium bolteae</i>         | 253 | FALSE | FALSE | FALSE | TRUE | 0.034 ± 0.049   | 0.001 ± 0.002 |
| ASV3370 | <i>Muribaculum intestinale</i>     | 250 | FALSE | FALSE | FALSE | TRUE | 1.013 ± 3.359   | 1.042 ± 2.593 |
| ASV1726 | <i>Parabacteroides goldsteinii</i> | 248 | FALSE | FALSE | FALSE | TRUE | 20.989 ± 20.721 | 5.247 ± 4.615 |
| ASV3224 | <i>Clostridium cocleatum</i>       | 246 | FALSE | FALSE | FALSE | TRUE | 0.275 ± 0.555   | 0.558 ± 0.461 |
| ASV4595 | <i>Clostridium leptum</i>          | 234 | FALSE | FALSE | FALSE | TRUE | 0.121 ± 0.169   | 0.024 ± 0.04  |
| ASV5389 | Lachnospiraceae                    | 229 | FALSE | FALSE | FALSE | TRUE | 0.369 ± 0.731   | 1.192 ± 1.241 |

**Table S6. Differentially abundant taxa between 21 and 30 months of age in normal aging mice detected by ANCOM, adjusted for cage, cohort and diet.** For each ASV, the first column represents its taxonomy information, the second column represents its W score and subsequent four columns represent logical indicators of whether it is differentially abundant under a series of cutoffs (0.9, 0.8, 0.7, and 0.6, a prevalence cutoff on the entire set of ASVs). The last two columns denote its relative abundance (%) in each group shown as mean ± standard deviation.

| ASVs    | Taxonomy                          | W_score | detected_0.9 | detected_0.8 | detected_0.7 | detected_0.6 | M21N          | M30N          |
|---------|-----------------------------------|---------|--------------|--------------|--------------|--------------|---------------|---------------|
| ASV5550 | Lachnospiraceae                   | 334     | TRUE         | TRUE         | TRUE         | TRUE         | 0 ± 0         | 0.477 ± 0.938 |
| ASV806  | Lachnospiraceae                   | 327     | TRUE         | TRUE         | TRUE         | TRUE         | 0 ± 0         | 0.283 ± 0.576 |
| ASV3224 | <i>Clostridium cocleatum</i>      | 327     | TRUE         | TRUE         | TRUE         | TRUE         | 0.48 ± 1.005  | 0.955 ± 0.931 |
| ASV5652 | Lachnospiraceae                   | 326     | TRUE         | TRUE         | TRUE         | TRUE         | 0 ± 0         | 0.248 ± 0.481 |
| ASV5435 | <i>Muribaculum intestinale</i>    | 316     | FALSE        | TRUE         | TRUE         | TRUE         | 0.001 ± 0.002 | 4.381 ± 7.109 |
| ASV3100 | <i>Clostridium sensu stricto</i>  | 296     | FALSE        | TRUE         | TRUE         | TRUE         | 1.222 ± 2.458 | 8.285 ± 6.248 |
| ASV3370 | <i>Muribaculum intestinale</i>    | 285     | FALSE        | FALSE        | TRUE         | TRUE         | 1.091 ± 2.427 | 2.785 ± 3.561 |
| ASV1053 | Unclassified Bacteria             | 278     | FALSE        | FALSE        | TRUE         | TRUE         | 0.331 ± 0.39  | 0.001 ± 0.004 |
| ASV1812 | <i>Anaerotruncus rubiinfantis</i> | 263     | FALSE        | FALSE        | TRUE         | TRUE         | 0.025 ± 0.017 | 0.004 ± 0.004 |
| ASV570  | <i>Muribaculum intestinale</i>    | 258     | FALSE        | FALSE        | TRUE         | TRUE         | 0.665 ± 1.52  | 1.999 ± 3.191 |
| ASV5628 | <i>Muribaculum intestinale</i>    | 254     | FALSE        | FALSE        | TRUE         | TRUE         | 0.03 ± 0.077  | 1 ± 1.592     |
| ASV3550 | Erysipelotrichaceae               | 250     | FALSE        | FALSE        | FALSE        | TRUE         | 0.052 ± 0.079 | 0 ± 0         |
| ASV1101 | <i>Clostridium XIVa</i>           | 238     | FALSE        | FALSE        | FALSE        | TRUE         | 0.038 ± 0.023 | 0.007 ± 0.006 |
| ASV360  | <i>Streptococcus danieliae</i>    | 220     | FALSE        | FALSE        | FALSE        | TRUE         | 0 ± 0         | 0.008 ± 0.01  |

**Table S7. Differentially abundant taxa between 21 and 30 months of age detected by ANCOM, adjusted for cage, cohort and diet.** For each ASV, the first column represents its taxonomy information, the second column represents its W score and subsequent four columns represent logical indicators of whether it is differentially abundant under a series of cutoffs (0.9, 0.8, 0.7, and 0.6, a prevalence cutoff on the entire set of ASVs). The last two

columns denote its relative abundance (%) in each group shown as mean  $\pm$  standard deviation.

| ASVs    | Taxonomy                             | W_score | detected_0.9 | detected_0.8 | detected_0.7 | detected_0.6 | M21                 | M30               |
|---------|--------------------------------------|---------|--------------|--------------|--------------|--------------|---------------------|-------------------|
| ASV5550 | Lachnospiraceae                      | 375     | TRUE         | TRUE         | TRUE         | TRUE         | 0 $\pm$ 0           | 0.554 $\pm$ 0.853 |
| ASV4147 | <i>Eubacterium coprostanoligenes</i> | 372     | TRUE         | TRUE         | TRUE         | TRUE         | 0.55 $\pm$ 0.661    | 0.178 $\pm$ 0.332 |
| ASV4247 | Unclassified Firmicutes              | 369     | TRUE         | TRUE         | TRUE         | TRUE         | 0.189 $\pm$ 0.886   | 1.879 $\pm$ 5.061 |
| ASV5435 | <i>Muribaculum intestinale</i>       | 369     | TRUE         | TRUE         | TRUE         | TRUE         | 0.138 $\pm$ 0.641   | 5.946 $\pm$ 7.562 |
| ASV3224 | <i>Clostridium cocleatum</i>         | 366     | TRUE         | TRUE         | TRUE         | TRUE         | 0.377 $\pm$ 0.798   | 0.756 $\pm$ 0.745 |
| ASV5652 | Lachnospiraceae                      | 366     | TRUE         | TRUE         | TRUE         | TRUE         | 0 $\pm$ 0           | 0.29 $\pm$ 0.452  |
| ASV806  | Lachnospiraceae                      | 365     | TRUE         | TRUE         | TRUE         | TRUE         | 0 $\pm$ 0           | 0.314 $\pm$ 0.504 |
| ASV608  | Unclassified Firmicutes              | 360     | TRUE         | TRUE         | TRUE         | TRUE         | 0.123 $\pm$ 0.466   | 4.633 $\pm$ 8.181 |
| ASV3370 | <i>Muribaculum intestinale</i>       | 357     | TRUE         | TRUE         | TRUE         | TRUE         | 1.052 $\pm$ 2.86    | 1.914 $\pm$ 3.168 |
| ASV5628 | <i>Muribaculum intestinale</i>       | 354     | TRUE         | TRUE         | TRUE         | TRUE         | 0.087 $\pm$ 0.195   | 1.422 $\pm$ 1.971 |
| ASV5266 | <i>Clostridium XIVa</i>              | 342     | FALSE        | TRUE         | TRUE         | TRUE         | 0 $\pm$ 0           | 1.084 $\pm$ 2.245 |
| ASV2776 | Unclassified Firmicutes              | 341     | FALSE        | TRUE         | TRUE         | TRUE         | 0.05 $\pm$ 0.125    | 0.534 $\pm$ 0.842 |
| ASV1060 | <i>Enterorhabdus muris</i>           | 340     | FALSE        | TRUE         | TRUE         | TRUE         | 0.003 $\pm$ 0.007   | 0.025 $\pm$ 0.023 |
| ASV3550 | Erysipelotrichaceae                  | 332     | FALSE        | TRUE         | TRUE         | TRUE         | 0.056 $\pm$ 0.093   | 0 $\pm$ 0         |
| ASV5389 | Lachnospiraceae                      | 327     | FALSE        | TRUE         | TRUE         | TRUE         | 0.432 $\pm$ 0.738   | 1.69 $\pm$ 2.134  |
| ASV1053 | Unclassified Bacteria                | 324     | FALSE        | TRUE         | TRUE         | TRUE         | 0.224 $\pm$ 0.348   | 0.09 $\pm$ 0.417  |
| ASV157  | <i>Subdoligranulum variable</i>      | 318     | FALSE        | TRUE         | TRUE         | TRUE         | 0.196 $\pm$ 0.284   | 0.066 $\pm$ 0.176 |
| ASV1101 | <i>Clostridium XIVa</i>              | 318     | FALSE        | TRUE         | TRUE         | TRUE         | 0.039 $\pm$ 0.027   | 0.012 $\pm$ 0.013 |
| ASV3100 | <i>Clostridium sensu stricto</i>     | 318     | FALSE        | TRUE         | TRUE         | TRUE         | 1.776 $\pm$ 3.757   | 6.518 $\pm$ 6.203 |
| ASV3306 | <i>Clostridium lactatifermentans</i> | 316     | FALSE        | TRUE         | TRUE         | TRUE         | 0.098 $\pm$ 0.112   | 0.261 $\pm$ 0.154 |
| ASV1970 | <i>Clostridium XIVa</i>              | 312     | FALSE        | TRUE         | TRUE         | TRUE         | 0.005 $\pm$ 0.013   | 0.071 $\pm$ 0.103 |
| ASV4595 | <i>Clostridium leptum</i>            | 310     | FALSE        | TRUE         | TRUE         | TRUE         | 0.102 $\pm$ 0.126   | 0.055 $\pm$ 0.129 |
| ASV5149 | Lachnospiraceae                      | 310     | FALSE        | TRUE         | TRUE         | TRUE         | 0.004 $\pm$ 0.017   | 0.046 $\pm$ 0.109 |
| ASV2609 | Ruminococcaceae                      | 308     | FALSE        | TRUE         | TRUE         | TRUE         | 0.02 $\pm$ 0.043    | 0.058 $\pm$ 0.078 |
| ASV3260 | <i>Longibaculum muris</i>            | 308     | FALSE        | TRUE         | TRUE         | TRUE         | 0.068 $\pm$ 0.07    | 0.025 $\pm$ 0.033 |
| ASV360  | <i>Streptococcus danieliae</i>       | 305     | FALSE        | FALSE        | TRUE         | TRUE         | 0 $\pm$ 0           | 0.006 $\pm$ 0.009 |
| ASV3447 | Erysipelotrichaceae                  | 300     | FALSE        | FALSE        | TRUE         | TRUE         | 0.058 $\pm$ 0.096   | 0.002 $\pm$ 0.005 |
| ASV1726 | <i>Parabacteroides goldsteinii</i>   | 299     | FALSE        | FALSE        | TRUE         | TRUE         | 19.963 $\pm$ 16.342 | 6.07 $\pm$ 4.97   |
| ASV570  | <i>Muribaculum intestinale</i>       | 292     | FALSE        | FALSE        | TRUE         | TRUE         | 1.52 $\pm$ 3.134    | 1.592 $\pm$ 2.524 |
| ASV4275 | <i>Proteus</i>                       | 284     | FALSE        | FALSE        | TRUE         | TRUE         | 0 $\pm$ 0           | 0.01 $\pm$ 0.025  |
| ASV2075 | Lachnospiraceae                      | 283     | FALSE        | FALSE        | TRUE         | TRUE         | 0.131 $\pm$ 0.492   | 0.097 $\pm$ 0.154 |

|         |                                   |     |       |       |       |      |               |               |
|---------|-----------------------------------|-----|-------|-------|-------|------|---------------|---------------|
| ASV2066 | <i>Clostridium saccharogumia</i>  | 280 | FALSE | FALSE | TRUE  | TRUE | 0.05 ± 0.084  | 0 ± 0         |
| ASV2904 | Lachnospiraceae                   | 278 | FALSE | FALSE | TRUE  | TRUE | 0 ± 0         | 0.174 ± 0.52  |
| ASV3361 | Clostridiales                     | 274 | FALSE | FALSE | TRUE  | TRUE | 0.021 ± 0.025 | 0.004 ± 0.007 |
| ASV3840 | <i>Eubacterium siraeum</i>        | 272 | FALSE | FALSE | TRUE  | TRUE | 0.023 ± 0.033 | 0 ± 0.002     |
| ASV3141 | <i>Clostridium methylpentosum</i> | 270 | FALSE | FALSE | TRUE  | TRUE | 0.012 ± 0.013 | 0.003 ± 0.008 |
| ASV4737 | Lachnospiraceae                   | 267 | FALSE | FALSE | FALSE | TRUE | 0.059 ± 0.173 | 0.159 ± 0.275 |
| ASV16   | <i>Clostridium bolteae</i>        | 253 | FALSE | FALSE | FALSE | TRUE | 0.02 ± 0.037  | 0.002 ± 0.005 |
| ASV3400 | <i>Clostridium XIVb</i>           | 253 | FALSE | FALSE | FALSE | TRUE | 0.068 ± 0.098 | 0.017 ± 0.026 |
| ASV1762 | <i>Clostridium scindens</i>       | 249 | FALSE | FALSE | FALSE | TRUE | 0 ± 0         | 0.022 ± 0.047 |
| ASV5225 | Unclassified Firmicutes           | 244 | FALSE | FALSE | FALSE | TRUE | 0.001 ± 0.002 | 0.006 ± 0.007 |
| ASV613  | <i>Flintibacter butyricus</i>     | 232 | FALSE | FALSE | FALSE | TRUE | 0.002 ± 0.007 | 0.015 ± 0.036 |

**Table S8. Differentially abundant taxa between healthy and normal aging mice at 21 months of age detected by ANCOM, adjusted for cage, cohort and diet.** For each ASV, the first column represents its taxonomy information, the second column represents its W score and subsequent four columns represent logical indicators of whether it is differentially abundant under a series of cutoffs (0.9, 0.8, 0.7, and 0.6, a prevalence cutoff on the entire set of ASVs). The last two columns denote its relative abundance (%) in each group shown as mean ± standard deviation.

| ASVs    | Taxonomy                       | W_score | detected_<br>0.9 | detected_<br>0.8 | detected_<br>0.7 | detected_<br>0.6 | Healthy aging<br>(M21H) | Normal aging<br>(M21N) |
|---------|--------------------------------|---------|------------------|------------------|------------------|------------------|-------------------------|------------------------|
| ASV2048 | <i>Muribaculum intestinale</i> | 366     | TRUE             | TRUE             | TRUE             | TRUE             | 5.129 ± 7.579           | 1.2 ± 3.98             |
| ASV570  | <i>Muribaculum intestinale</i> | 289     | FALSE            | FALSE            | TRUE             | TRUE             | 2.375 ± 4.087           | 0.665 ± 1.52           |
| ASV1959 | Porphyromonadaceae             | 268     | FALSE            | FALSE            | TRUE             | TRUE             | 0.982 ± 1.702           | 0.513 ± 1.483          |
| ASV3256 | Porphyromonadaceae             | 260     | FALSE            | FALSE            | FALSE            | TRUE             | 0.841 ± 1.441           | 0.44 ± 1.258           |
| ASV1791 | Porphyromonadaceae             | 238     | FALSE            | FALSE            | FALSE            | TRUE             | 0.395 ± 0.688           | 0.202 ± 0.58           |
| ASV4558 | Bacteroidales                  | 232     | FALSE            | FALSE            | FALSE            | TRUE             | 1.063 ± 2.401           | 0.156 ± 0.452          |

**Table S9. Differentially abundant taxa between healthy and normal aging mice at 30 months of age detected by ANCOM, adjusted for cage, cohort and diet.** For each ASV, the first column represents its taxonomy information, the second column represents its W score and subsequent four columns represent logical indicators of whether it is differentially abundant under a series of cutoffs (0.9, 0.8, 0.7, and 0.6, a prevalence cutoff on the entire set of ASVs). The last two columns denote its relative abundance (%) in each group shown as mean ± standard deviation.

| ASVs    | Taxonomy                       | W_sc<br>ore | detected_<br>0.9 | detected_<br>0.8 | detected_<br>0.7 | detected_<br>0.6 | Healthy aging<br>(M30H) | Normal aging<br>(M30N) |
|---------|--------------------------------|-------------|------------------|------------------|------------------|------------------|-------------------------|------------------------|
| ASV648  | <i>Akkermansia muciniphila</i> | 323         | TRUE             | TRUE             | TRUE             | TRUE             | 15.487 ± 18.623         | 3.812 ± 6.979          |
| ASV73   | Ruminococcaceae                | 300         | FALSE            | TRUE             | TRUE             | TRUE             | 0.298 ± 0.566           | 0 ± 0                  |
| ASV2756 | <i>Acetatifactor muris</i>     | 270         | FALSE            | FALSE            | TRUE             | TRUE             | 0.069 ± 0.042           | 0.02 ± 0.033           |
| ASV3370 | <i>Muribaculum intestinale</i> | 258         | FALSE            | FALSE            | TRUE             | TRUE             | 1.042 ± 2.593           | 2.785 ± 3.561          |
| ASV698  | Unclassified Bacteria          | 253         | FALSE            | FALSE            | TRUE             | TRUE             | 0.935 ± 1.527           | 1.547 ± 2.031          |
| ASV3100 | Clostridium sensu stricto      | 248         | FALSE            | FALSE            | TRUE             | TRUE             | 4.75 ± 5.907            | 8.285 ± 6.248          |
| ASV2776 | Unclassified Firmicutes        | 228         | FALSE            | FALSE            | FALSE            | TRUE             | 0.74 ± 1.023            | 0.329 ± 0.591          |
| ASV3939 | <i>Turicibacter sanguinis</i>  | 218         | FALSE            | FALSE            | FALSE            | TRUE             | 2.442 ± 3.116           | 2.59 ± 3.045           |
| ASV1123 | <i>Enterorhabdus</i>           | 216         | FALSE            | FALSE            | FALSE            | TRUE             | 0.003 ± 0.006           | 0.011 ± 0.009          |
